# Supplementary material
Source: Springer Nature journal article supplement (https://www.springermedizin.de/resource/supplementary/13012_2013_717_MOESM4_ESM.pdf/9630314)
Supplement: MOESM4 [file 9630314]

14 clinics and  
53 physicians

```
graph TD; A["14 clinics and 53 physicians"] --> B["Allocated to intervention (feedback + worksheet)"]; A --> C["Allocated to usual care (feedback alone)"]; B --> D["Lost to follow up"]; B --> E["Analyzed"]; C --> F["Lost to follow up"]; C --> G["Analyzed"];
```

Allocated to intervention  
(feedback + worksheet)

7 clinics  
22 physicians  
2157 patients

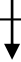

Lost to follow up

0 clinics  
2 physicians  
(1 died, 1 retired)  
325 patients

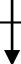

Analyzed  
7 clinics  
20 physicians  
1832 patients

Allocated to usual care  
(feedback alone)

7 clinics  
31 physicians  
2460 patients

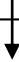

Lost to follow up

0 clinics  
2 physicians  
(1 withdrew, 1 retired)  
237 patients

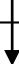

Analyzed  
7 clinics  
29 physicians  
2223 patients
